# Supplementary material for: A hollow void catalyst of Co@C(Z-d)@void@CeO2 for enhancing the performance and stability of the Fischer–Tropsch synthesis
Source: Royal Society of Chemistry journal article supplement (doi:10.1039/d3ra04884e), 2023-01-01
Supplement: d3ra04884e1.pdf [file d3ra04884e1.pdf]

## Supplementary Information

### **A hollow void catalyst of Co@C(Z-d)@void@CeO<sub>2</sub> for Enhancing the performance and stability of the Fischer-Tropsch Synthesis**

Masoud Safari<sup>1</sup>, Ali Haghtalab<sup>1,\*</sup>, Farzaneh Arabpour Roghabadi<sup>1</sup>

*<sup>1</sup>Faculty of Chemical Engineering, Department of Process, Tarbiat Modares University,  
P.O. Box: 14115-143, Tehran, Iran*

*\*Corresponding author's email: [haghtala@modarse.ac.ir](mailto:haghtala@modarse.ac.ir)*

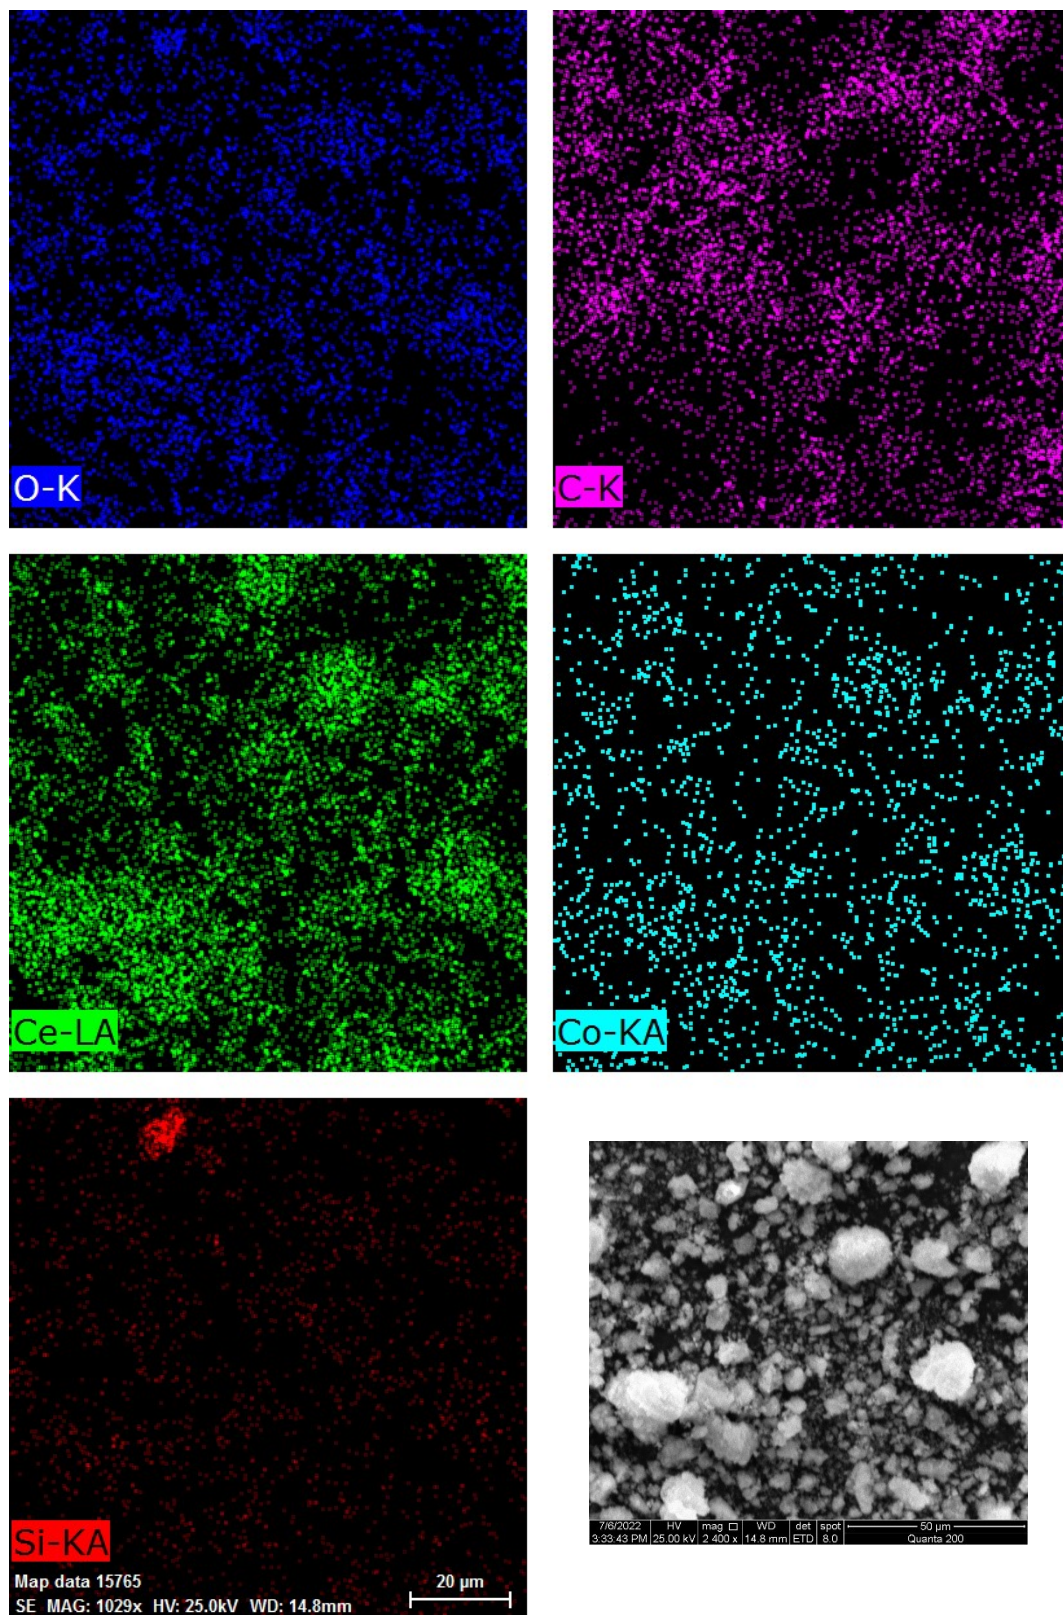

*Fig. S1. FESEM/Map data of NC-V Catalyst.*

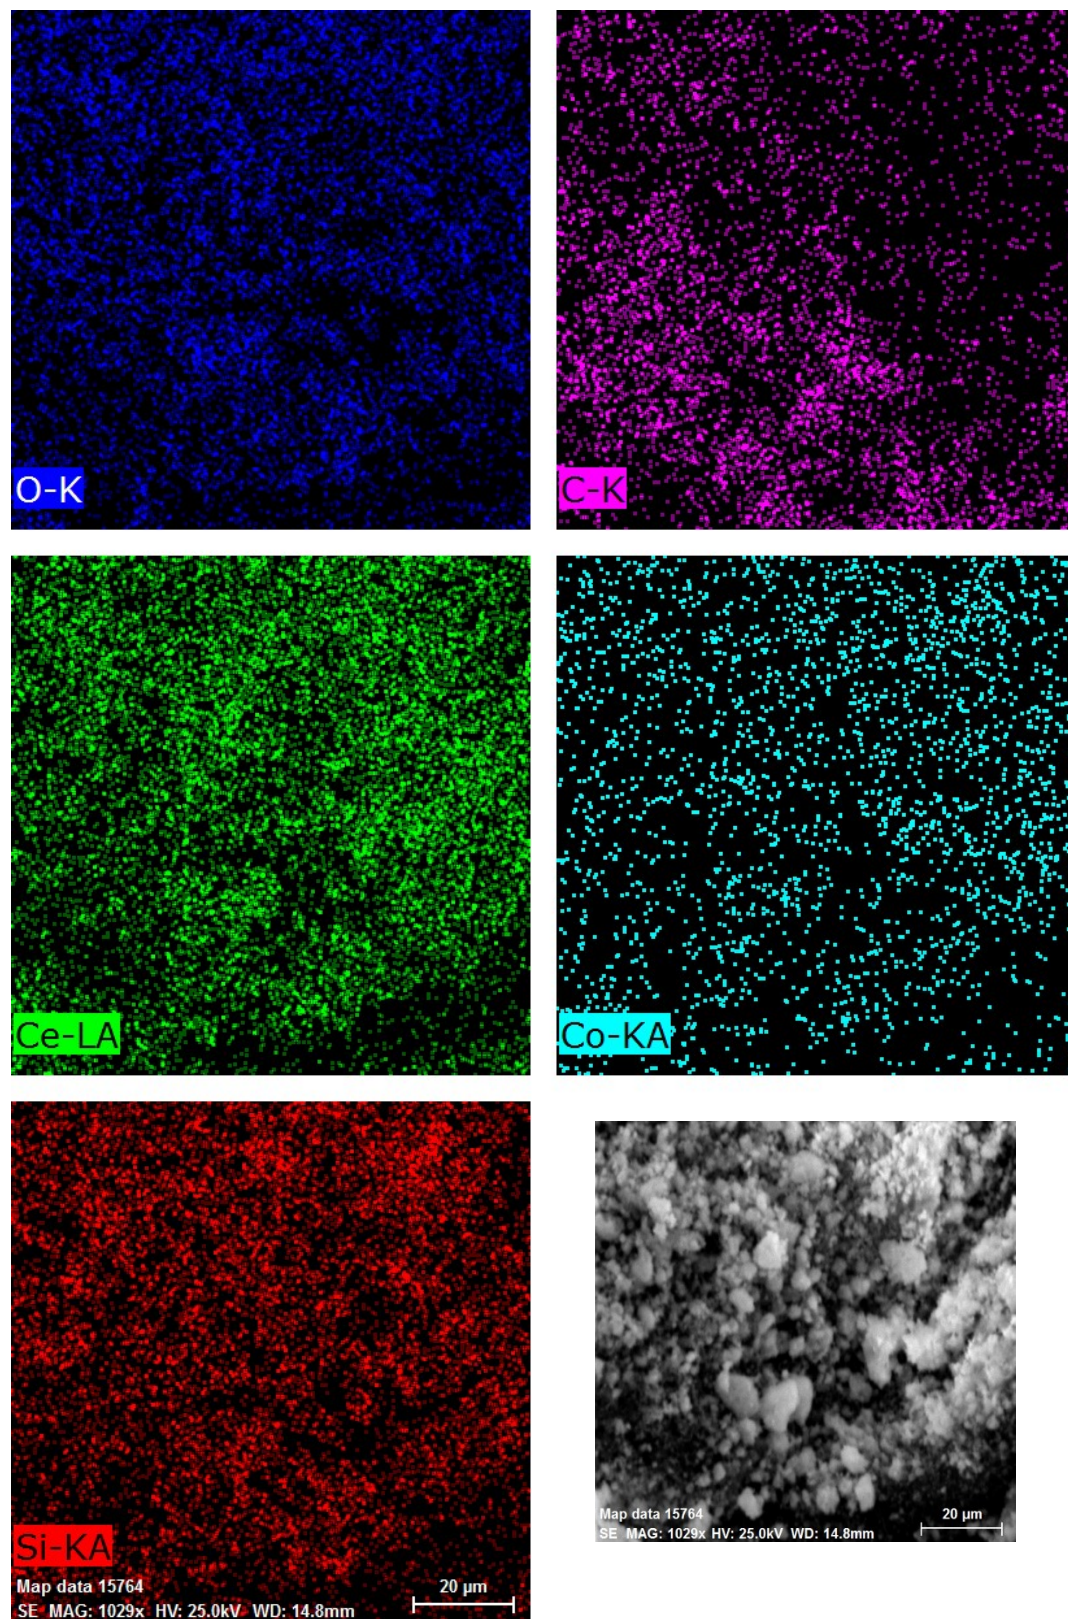

*Fig. S2. FESEM/Map data of NC Catalyst.*
